# Supplementary material for: Analysis of the Roles of the Arabidopsis nMAT2 and PMH2 Proteins Provided with New Insights into the Regulation of Group II Intron Splicing in Land-Plant Mitochondria
Source: MDPI journal article supplement (doi:10.3390/ijms18112428), 2017-11-17
Supplement: s1 [file s1]

## A. *nmat2* (At5g46920) full cDNA sequence:

5' ...**agaagaggaagaagtcgaag**ctgttccatcaatcgctccgaa**ATGCGTAGAAGCTTCTCTGTTTGGGTCCTTACAAATGGCTAAAACCTTCTTCTACATATACCAACGT**  
TTACTGCTTCGTCACAAATCCTCCTCTCATTTCTAACCCTAACCAACGGCTCTGCGATTTTCCGATATCTATCTTACTTCGCACCTCAACAACGAAGACAACAACAACAGC  
ACCAGATCCAGATGATCCAGCGAATCTATTGAAAGAAGATGGAGTATCTCTCTGTTCTCAGATGTGGCTTGAGAATTTCAAAGAACCTGACAAAACCGCTACTAATTTAAC  
CTCGTATCTTCGTAGATTCGAGTTATGGGTATTAGCTTATCAGAAAAGTTTGTGTGATGAATTAGGTGCTTATGTTCCCTCGTAGCTCTATTCAAAGATCAGCTTTAGAGAA  
TTTGTTAGCTTTTAAGAACTCTGTTCTCGATGATCGGTTTAAATGGGGTTCTCGGTTGGATTCTATATTAATCTCCTAGAGATAAGACCGATTACGAGTCGTTGTCGAA  
GAGGAAGATTAAAGCGATTTTGACTACTACGCAGCCTACTCCGTTTCAGGATAGGATAGTTTCAGGAGGTTTGTGTGATGATTTTGAACCGATATACGAATCTCGGTTTTTC  
GCAAAAATCGTTTTCGTTTTCGGCCCCGGGAGGACCGCGCATACGGTGTGAGAGTGATTTCGGAGGAATTCGCGGGTTATTTGTGGTATGTTAAGGGTGATTTGAGTGTGT  
GTTGGATGGAATGAAAGTTGGTTTGTGATTAGTTCTTTGATGAGAGATGTTAGAGATAAGAAAGTGATTGATTGATCAAATCTGCGCTTGTTACACCTGTTGTAACGAG  
TAAAGTTGAAGATGGTGAGAAGAAGAAGACTAAGAAGAGAAAATATCAGAAAAAACGGGTTTGGCTGAGGATGAGCCCCAAGCCTGATCCTTATTGGTTAGAGACGTTCTT  
TGGTTTTGCTCCTGAGGAAGCTGGGAAGTCTCCGCAGTGGGGACATTGCGGGATTCTTAGTCCTCTTTGGTTAATGTATGTCTTGACGAGCTTGATCGTTGGATGGAAC  
GAAAGTGAAAGACTTTTACCCTCCTTCGAAAAGCGATGTTATATGGAATAACCTGAAGGAGAAGCGGATCAAGGAAACACTTCTTGGCCGGAATTTGTTCCACGAGTGG  
TCCTGACAAAACGAGGAAAATGGATTACGTTAGATATGGAGGTCATATCTTGATTGGTGTCCGTGGACCTCGAGCTGATGCTGCAACGTTAAGGAAGAGCTTATTGAGTT  
TGTTGATCAGAAGTATATGCTTAGACTCGACAATGAGAATCTACCCATTGAACATATAACAAAAGGTATAATGTTCTTGATCATGTTTTGTGTGCGCGAGTTGTTTATCC  
GACTCTGAGGTATACTGCGACCGGTGGGAAGATTATAAGCGAAAAAGGCGTGGGAACGCTTTTATCCGTTACAGCGAGTTTGAAGCAATGCATCAACAGTTTCGAAAGCT  
GTTATTTATAAAAGGAGATCGTGATCCGGATCCACAGCCTTGTTTTAGAAATGTTCCACGCAACTCAAGCTCATACGAATAATCAGATGAATAAGTTTTTGACTACGATTGC  
TGAGTGGTATCGGTTTGCAGATAACAGAAAGAAAATTGTGAATTTCTGTTCTTATATTATCCGTGGTCACTTGCTAAGCTTTATGCTGCAAAGTATAAACTTAGATCAAG  
AGCAAAAGTGTATAAGTTCGCTAATCGGAATCTGAGCCTTCCGTTGTGTCAGAAAGAGTCCAGTCACCAGAATATCAGAATCTCTTAAGAATGGGCTCTGCTGAATCGGT  
TGATGGACTTGTTTATACAAGAATGTCTTAGTTCCAGAACTGATTACTCGCCTTCCCGGGTAATTGGAGGCCGAGCAGCAGAGAAGTTTCTGATCGAGTACTTAACACT  
CGATGAACCGAAAACCTTAGAAGAGCAAAAGAGATTTATTAGAGAGAAAGGGCTCGTTTCGCCTCAGGATTACACATCGATGTTGGTTTGGAAGTATAAGAGAAATGCTAT  
TCCAATGGATCAAGTTTCAATTCTAAAGGATCAACCTTCTTGTGTTGGGATCATCAAGTACCTACAACCGCGACAATGATGATCAGAAGAATAAAGAAGAAGATGAAGATAG  
TGAAGATGGG**C**TTTCGCATTGCACGCATGTAAGaaaccagaaaactgtttgacttttactcttatatcaagcttgataaatttgatgcatattagccattcccatccg  
tttgtttcggctattgtatgcaaacacc**aaatttattagcattggtattttc**...3'

## nMAT2 (At5g46920) protein sequence:

Predicted targeting site

**MRRSFSVLGPYK**WLKPSSTYTNVYCFVTNPLISPNNGSAIFRYSYFAPQRRQQQAPDPDDPANLLKEDGVSLCSQMWLENFKEPKDTATNLTSYLRRF**ELWVLAYQ**  
**KVCCDELGAYVPRSSIORSALENLLALRNSVLDDREFKWSRLDFYIKSPRDKTDYESLSKRRIKAILTTTQPTPFQDRIVQEVLLMILEPIYESRFSQKSFAFRPGRTAHT**  
**VLRVIRRNFAGYLWYVKGDLSVVLDMGMKVGFVISSLMRDVRDKKVIDLIKLSALVTPVVTSKVEDGEKKKTKRKYQKKRVLAEDEPKPDYPWLETFFGFAPEEAGKSPQWG**  
Fingers-palm region  
**HCGILSPLLNVNCLDELDRWMETKVKDFYRPSKSDVIWNPEGEADQGNTSWPEFVPTSGPDKTRKMDYVRYGGHILIGVRGPRADAATLRKELIEFVDQKYMLRLDNENL**  
Thumb (X) domain  
**PIEHITKGIMFLDHVLC**RRVVYPTLRYTATGGKIISEKVG**TLLSVTASLKQCIKQFRKLFLIKGDRDPDPOPCFRMFHATOAHNTNOMNKFLLTTIAEWYRFADNRKKIVN**  
**FCSYIIIRGSLAKLYAAKYKLRSRAKVYKFANRNLSLPLLOKKGOSPEYONLLRMGLAESVDGLVYTRMSL**VPETDYSPPFGNWRPEHEKFLIEYLTLDPEKTLLEEQKRFIR  
EKGLVSPQDYTSMVLWNKYRNAIPMDQVSILKDQPFLLGSSSTYNRDNDDQKNKEEDEDSEDGLRIARM

## B. *pmh2* (At3g22330; full cDNA sequence)

5'...ggaactaaaaccccttgaccttctttcttcatctctctaaatccctaattctccaaattttggggttttacattttccttatcaagagaacacctgaatctgaaaATG  
ATCACTACAGTGCTACGACGATCTCTCCTTGATGCGTCGAAGAGGAATCTCTCCGCTTCGTTGACCTCAATCAATACTGTTCTGTTTCACAACCTGGCCCCAGCCGCCACT  
AGAGTCTCCGACCTAGCCTTAATTGGATCTTCCGATGTCAAAGCTGGGTTTCCGTTTGGTGTGAAGCGAAAGGAATTCATTTTCAATCTGGGCCGTTGGATTTTAGAGCT  
TCGATGGTTTCTCAAGCTGGATTTGCGATCTCTGAGAGTAGCGAGAGAGGGTTGGTGATTTCGGAGAGTGTTGGTGGTGATGGGCTTGCATATCTGAGCTTGGGATATCT  
CCGGAGATTGTTAAAGCTTTGAGTAGTAAGGGTATTGAGAAACTCTTTCCTATTGAGAAAGCTGTGCTGGAGCCAGCGATGGAGGGTCGAGATATGATTGGTCGTGCTAGG  
ACTGGAACGGGAAAGACACTTGCTTTTGGGATTCTATCATTGACAAAATCATCAATACAACGCTAAACATGGACGAGGGAGGAATCCGCTTTGTTGGTTTGGCACC  
ACAAGAGAGCTTGCTCGCCAGGTTGAGAAGGAGTTAGGGAGTCTGCTCCGAGCTTGGATACATTTGTCCTTATGGAGGTACACCGATTGGACAGCAAATGAGGCAGCTT  
GACTATGGTGTGATGTGGCGGTTGGAACCTCAGGTCGTGTCATTGATCTGATGAAGAGAGAGCTTTGAATCTATCGGAAGTTCAGTTTGTGGTTCTGGATGAAGCTGAT  
CAGATGCTTCAAGTTGGATTTGCTGAGGATGTTGAAAATAATTGGAAAAGTTGCCTGAGAAACGTCAGAGTATGATGTTTCTGCAACAATGCCGAGTTGGATCAGATCT  
CTCACTAAGAAGTACCTGAATAATCCTTTGACAGTTGATCTTGTGGAGATTCTGATCAGAACTAGCAGATGGAATTACGACATATTCTATCATAGCAGATTCTTATGGA  
AGAGCATCCATTATTGGTCTCTTTGTAACGGAGCATGCCAAAGGAGGAAAAATGCATTGTTTTACACAAACAAAACGAGATGCTGATCGCCTTTCATATGCATTGGCTAGA  
AGCTTCAAATGTGAAGCTTTACACGGTGATATATCCAGAGTCAGAGGGAAGAACGCTTGCTGGTTTCCGAGATGGGCATTTCATATTTCTGTGCGACTGATGTTGCT  
GCCCGTGGACTTGATGTACCTAATGTCGATTTGATCATTCACTATGAGCTTCTCTAATAACACGGAGACATTTGTCCATCGAACCGGGCGAACGGGTCCGGCTGGAAGAAA  
GGAAAGTGCTATTCTGATCTACAGTCAAGATCAATCCAGGCTGTAAAAATAATTGAGAGAGAAGTTGGGAGCCGATTCACTGAGCTCCCTAGCATTGCTGTGGAACGTGGA  
AGCGCAAGCATGTTTGAAGGAATAGGTCTCGATCCGGTGGTCTCTTTGGAGGAGGCATGAGGGATCGTGGTTCAAGCTTTGGTGGTCGTTCAGGCGGTGGTGGTTATGGT  
GGCAGCAGTGGTGGTTATGGTGGTGGCGTTTCAGGCGGATCAAGCAACCGTTATTCTGGTGATTCTGACCGTCTGGTTTGGGAGCTTCGGTATGCGTTCTCCTGAGGGA  
TATGGTTCGGATCGTTTCATCTCAGTCAGGTGGAAGGAGCAGCTTTGGTGGTGGTGGTTCAGGCGGATCATCAAACAATCGTTCTCTGGTTTCCGGGACTTTGGCTCTGAC  
CGTTCTTCTCAGTCAGGCGGAAGGAGCAGCTTTGGTGGGTTTGGATCAAATGATGGGAAAAGATCTTACTGA<sup>gagaagtggttttggagccgagccggcaataattgggtt</sup>  
gacctagaggaggaggaggttcggtgactcgagtagattagttactacgcgagatcgaaggagtcgaagttatatataataatctgtagctatgtaaacacaacatatac  
tttcgaagttatggttatcatcatcttcatatgaggtgattatcttctt<sup>tttgcataatttggttggtttatatt</sup>...3'

## PMH2 (At3g22330) full protein sequence

Predicted targeting site

MITTVLRRSLLDASKRNLSASLTSIINTVLFHNLAPAATRVSDALIGSSDVKAGFFPGVEAKGIHFQSGPLDFRASMVSQAGFAISESSERRVGDSESVGGDGLAISELGI  
SPEIVKALSSKIEKLFPIQKAVLEPAMEGRDMIGRARTGCTGKTLAFGIPIIDKIIKYNAKHGRGRNPLCLVLAPTRELARQVEKEFRESAPSLDITICLYGGTPIGQQMRQ  
LDYGVDVAVGTPGRVIDLMKRGALNLSEVQFVVLDEADQMLQVGFADVEIILEKLPEKRQSMFSAITMPSWIRSLTKKYLNNPLTVDLVGDSQKLADGITYSIADSY  
GRASIIGPLVTEHAKGGKCIIVFTQTKRDADRLSYALARSFKCEALHGDISQSQRERTLAGFRDGHFNILVATDVAARGLDVNPVDLIIHYELPNNTETFEVHRTGRTGRAGK  
KGSAILIYSQDQSRVAKIIEREVGSRFTLPSIAVERGSASMFEIGIGSRSGGSFGGGMRRDGRSSFGGRSGGGYGGSSGGYGGGRSGGSSNRYSGDSRSGFSFGMRSP  
GYGSDRSSQSGGRSSFGGGRSGGSSNRRSSGFGDFGSDRSSQSGGRSSFGGFSNDGKRSY

## Figure S2. The topology of nMAT2 and PMH2.

The cDNA sequences of nMAT2 (A) and PMH2 (B) were obtained by RT-PCR with specific oligonucleotides (underlined and marked in red letters). The PCR products were cloned into the pGEM-T vector system II (Promega) and sequenced (The Center for Genomic Technologies at the Hebrew University of Jerusalem). The resulting sequencing data is illustrated on the corresponding sequences of nMAT2 and PMH2. Capital blue letters indicate the coding regions, while black lower-case letters represent 5' and 3' UTR regions. The insertion sites of T-DNAs in *nm2* (SALK-line 064659) and *pmh2* (SAIL-line 628C06) genes are indicated by red arrows. The deduced amino acid sequences of nMAT2 and PMH2 are given below each cDNA sequence. Arrows represent conserved domains in nMAT2 and PMH2 as predicted by the SMART (Letunic *et al.* 2012) and Conserved Domain Database (CDD) (Marchler-Bauer *et al.* 2003) servers. These include the N-termini mitochondrial targeting signals (marked in blue) and the fingers-palm (amino acids 104 - 461) and thumb (X) domains (amino acids 486 - 625) of nMAT2 and the two conserved motifs typical to DEAD-box RNA helicases (amino acids 124 - 326 and 364 - 443). The consensus ATP binding site (amino acids 148 - 154) is underlined.
