# Supplementary material for: Analysis of the Roles of the Arabidopsis nMAT2 and PMH2 Proteins Provided with New Insights into the Regulation of Group II Intron Splicing in Land-Plant Mitochondria
Source: MDPI journal article supplement (doi:10.3390/ijms18112428), 2017-11-17
Supplement: s1 [file s1]

**nad2**  
ATGAAAGCAGAATTCTGTTCCGATCCTCCCACACATGTTCAATCTTTTTTAGCGGTTTCCCAGAGATCTTTATCATTAATGCAACCTttATTTTGCTCATTCATGGAGTTGTATTAGTACCTCTAAGAAATATGATTATCCGC  
CGTTAGCCAGTAATGTGGGTGGCTTGGAATTACTTAGTGTtgcgcgcctaggaaggcagcgcgcttgggagatgcaagaggaactatatcgccagcccccctaccctaacctaatgcgcgcgcggattgcggaccgcaggaacgcta  
gcatggggggggggacgtctaattctttgcgcgcgcgaagctggctaatcgtacgcagcagagctcgaaagaccccctggttctggaaggcacatgaqtccgaacgctatgttqaatgtgcgaccgcacactacgtaggtaccagtg  
caggtgaggcctcggtcggtctctagaaacgcgcgcaacgcgcgcaggaagttaacgacccgacgtctgctgcaacctagggaacaccagcagctcttgcgtctataggatcgggggggacatagcacaattcctcttggagggggg  
tgggttgcgcgggtgactgatactgcaatactgtactcttaccatatagcaccggcaaccgaaagtaagcatacataggacgatctcatgctgtaatagccgggaagaaagggcggtgatatgatatgataatgaaaaagggcgcc  
gcgtctgtacggggcgggcggaatggatgagcaaaaggtgccatggggtaggaatatcccgagtctcatatgtaagacaactaaatgcaccccgaggtgctgccgaggaactgggagacctctcgcagcacaggataggcaattgaa  
agatagagctgaccttcttcggtattggggaatactaactgctcgggcggaataaagcttacctgcgcgcacctggcttccccggcgcatattagagctagctgctttaataggtcggttgtgtggtctctctcttgcaccttctct  
aaccagtgagaaaaaggttcgcttatgtctgaggggttttttccactagtgatcggtctgagttacgcgcaaatccgaaagatttacgcgacagcgcacatgcagggaactgtgcagtgtggttctggcggggttctct  
cggttcttctgcttCTAATAACCTTGCTTCTGCTCGCCGCTGGCGCACTCTCTCACTATTGCCCAATTTATCTGGAATAATTTTTTAGGAGGGACAATTTTACATATTTTGCCAAATCTTTTTATTATTAGTACGCGTGTACCAATT

[illegible]

[illegible]

tggatcaaaacaaaacagcaataggggcccgtagcactgacctctttttttattgattcaataataaggggaaaagatcgtaagttccctaccgagacaagagacactcttaacagatccctccgcgcgtgggcataacctctt  
ccgtgcgtctttctcgtggcaggaacagaacaacaggggaaagaaagacccggggccgacctgcccagggtcgaggggcagcttatttaagagagaatggggagcgaatcgaaaggcttccgttttagttcttgggttggttcg  
ggctcctctcgatctttttcgttagtagggaaggggaaggagctctaaatctatggacatttaagccatcttagtggaacttgacatgacacgatcaattcgactcagggttcggcgctaatagaggttgcttactttctcta  
gtagcgaaggaagggcagggtctttttctgttgtaatagtgggcggtctcctttcgaagtaaaggccttcgcatttctaatccgccccaccaaccccgacggcttagtttgtccagcttggtgaatcgcatccccgcgcaa  
cgacatagttttatgcccctttaccgttctcgtcagtggtttgcaacggctgqggagcagtcgtagaagcgaagtctatcgccacgcccaaccatcaaatacgagattgqgccccttctcaagaatttgatggaaatggccaccc  
aatagcgttattgtcatatgggaactcatggctggaacaatccttatggttttgataccggttagaataataagaatcaaaagtcaggtaggttggtagacctaagtgataggagactatctagcttggttcggaagacacttg  
ttgggttaaaaaacttttttgttgcataaatgttacagcctaataatgctgaactattgactctaCTCGTTGGATGGGTGTTACCCCAAAGTGTTCGGACTGCATGCATACATCCGTAAGTAACCTAGTGCAACATGGCAAATT  
TCATTGA

## nad5

ATGTATCTACTTATCGTATTTTTGCCCTGCTCGGTAGTTCGTAGCAGGTTTTTCGGACGTTTTCTAGGATCAGAAGGAAGCGCTATAATGACCACTACGTGCGTTTTCACTCTCTTCGATCTTATCTTTGATTGCTTTTTATG  
AAGTCGCACGGGAGCTAGTGCTTGCTATCTAAGAATTGCTCCATGGATCTCATCGGAAATGTTTGATGCTTCTTGGGGCTTCTTtggcagccgtgaagtcacccgqatgaattgcccagtagatagatctgacccgacgcgt  
gttctctccgcgqataggaactcgaccgtctctaccaccccgggacacatagcatgtcgggaataagggggacatactggaactgaaccactcccttgggttctgggaatttctgcttcaatcgatacacagttgaat  
agccgcatcacgaacgctacaggtgtggaagcgtcctggtcaggggaagcctaagacggcgccctgcataatggtagcaagaagggccttatgcccacaggtggaaccttatgggaagggccacgcaataggaacagcacac  
ccccgcttcaagcgcaactctgtatcgactgaataactcttttgggtctagtcggtggaacgggtgaaccacgcaagctggttagatgcgtgqggcagagggctcgtagtaccctcttcttgatccagccttctctcgcgc  
ttcggtagtgaattacctactcaaaaaataggaagggcgtgacggcctatttctgaactactaagcgggtggtgactcttgaaggggaagagggcctaagcagcggtttttcgtacacttttagtggaatcgtaacctgttt  
ttcagcgctgtttggacatacggttcccgccggaagatcaagttggtgagccgtgtgtagggaaaccttcccgacggttcggagagcactgaattagaatgagaggttcaccaccacatacttgcatgcaagggagcgtcgct  
cgattcgcaaataggtccgactcgtaattcaacttctgactctgtGTTTCGATAGCCGACCGTAGTGATGTTAATTGTGTTTACATtATAAGTAGCTTGGTCCATCTTTATCCATTTTCATATATGTCGAGGATCCGCATAGCC  
CTCGATTTATGTGTTATTTATCCATTtTACTTTTTTTATGCTAATGTTGGTGACTGGAGATAACTtCTTCAATTATTCCTGGGATGGGAGGAGTAGGTCCTGCTTCATATTTGTTAATTCATTTTTGGTTTACACGACTTCA  
GGCAGATAAAGCAGCTAATAAAGCTATGCTTGTCAATCGAGTAGGTGATTTTGGATTAGCTCTTGGGATTTGGGTtGTTTACTCTCTTTCAAACAGTAGACTTTTCAACCATTTTGTCTGTGTCTAGTtCCCAGAAATCT  
TGGATTTTGTCAATATGAGATTGAATGCCATAAGTCTTATTGTATTTTACTTTATTGTTGCTGTTGGGAAATCCCGCAGATAGGATtGCATACTTGGTACCCGATGCTATGGAGGGTCCCACTCCAGTATCCGCTTGA  
TTCATGCAGCTACTATGGTAACAGCTGGCGTTTTTCATGATAGCAAGGTGtTCCCCTTTATTGAATACCACCTACGGCTTTGATTGTTTATTACTTtTGCAGGAGCTAGACGTCATTCTTGGCGCAACCACTGGAATATTACA  
GAACGATCTAAGAGGGTCATCGCTTATTCAACTTGTAGTCAATTAGGCTATATGATCTTTGCTTGCGGCATCTCTAACTATTTCGTTAGCGTCTTCACTTAATGAATCAGCCTTTTTCAAAGCATTACTATTCTCTGAGTGCT  
GGTTCGGTGATTTCATGCCATGTCGGATGAGCAAGATATGCGGAAGATGGGGGGGCTTGCCCTCCTCCTTCCCTTTGACCTATGCCATGATGCTCATAGGCAGCTTATCTCTAATTGGATTTCCTTTTCTAACTGGATTATTTC  
AAGATGTGATCTTAGAGCTCGCTTACACTAAGTATACCATCAGTGGGAACCTTGTCTTTCTGTTGGGAAGTGTtCTGTCTCTTTCACTTCTTATTACTCTTTTCGTTTACTTTTTCTAACATTTCTAGTACCAACTAATTCGTT  
CGGGCGAGACATCTACGATGTCATGATGCGCCCATTCCTATGGCCATTCTTTAATACTTCTGGCTCTCGGGAGTCTCTTTGTAGGATACCTTGGCCAAAggaagaaqatattaagcgggtccagaggttgcacggcgaacttcga  
taacgcgaggaatcccgccgtcgtctggaagtagccgcgcgcctggtatccggaaggtgcgcgagctagaatcaagaatgqgcactcttcaagaaaaggaatgcctccgggctaggaagatagccgaatggaaggaagcgttttcgg  
aggaatttagcggcgggaaggggaagaaagacccgccttgcatctactaaattcgtggtcgaagtgatcatccatcacaggaataaccaaccccccaaaactaaagctttcgttctctcttttttacttgattggcaggtg  
taacaacaccttaacccgcgaagcctgggctgggctacctccatccttagaggagcgttagggcggaagccccacgtacggttttgaagcagccttccagcaatggggcttagggacc...gggcggccggcctactac  
gggcacccgcctgtagggattagtgctgagacccgataccacaaactgaacgatgggactcacccttacttgagaataaaggaggggaaagatagcatgtcccaagagcaggcgagtttgaaccccgccgggagggacg  
cctcgcgagccgggttccagagatgaggccttttggcgaagcgaagtttcttccggccaccaaaccctgcaactgatgagaagaagggcctatggagtaaagggaagcgtgtacgttgtcacactccctgccttccaaaggt  
gcctagaggacgggcccagacgcagcggagcgacaacccgggagcagagtcctccaccggcagggggacagagacggccatcaagaagcacatcacgactacaggttaagacggcgagaccaggaaggaacccgaattgggag  
cagaggatccatagtaactgcagcccGATATGATGATTGGTTTAGGTACgggcctagctactagtaggaatggtaaacccgataagcttcttctgttatacgggaagaaatagagagttccgcctc  
tgttcgacgcggggtctcgaattggagaaagataattaagcgggtccagaggttgacgggaacttcgaataacgcgaggaatcccgccgtcgtctggaagtagcccgccgctggaatccggaatgcgcgagctagatcagaag  
tggcactctttcaagaaaaggaatgcctccggcctagccagatagccgaatggagggagacgttttcggaggaattagcgcgggaaggggaagaaagacccgccttgcatctactaaattcgtggtcgaagtgatcatccatc  
acggaataaccaaccccccaaaactaaagctttcgttctctcttttttacttgattggcaggtgtacaacaaccttaacccgcgaagcctgggctgggctacctccatccttagaggagcgtatgaggcggaagcccc  
acgtacggttttgaagcagagccttccagcaatggggcttagggacc...cagtcgtctcatagagcactgcggaaatcgaagtcagggttaggttagtcagcttcccgctcagctttcgggtgtcaaggtcagattctt  
taaacacacgtccttagaggcgtattgattgacgagatggggaataatgcctagctcaaatcaaaagtaagtaggttacggttctgttctgtctcgtataggttcggtgtagggcgtcttccatcagatcaattta  
atattggaaaaagaaaatccggtgggtttttatcgtgagctcctttcgcgagtcgataccttgcctgcattattataatggcggaacatattccttttcccttcaaaactcaaaagggaaaaagatgctatctattccattat  
gcggcaataccgcgcgaggagtagagtgagtcagcttccatatttctgactgaaaggtcttttggtcgtatgcgttaacaaaagggaactctctagatgaagaatgaatttcttccatgaagccggacggcgacga  
ataataaataaggtacgtacccccacccagcgaggttagtgagcgtgttaatagggcagcaatttcgcgcggttcggggggcacttgagtaagccgcggcgcccgactgcgtcttgacccctatCAATTTTGGGCCAATCCC  
tCTCGTACTACCAAAAAATGAGATTCTTGCCGAATCCGAGTTTGTGCTCCCAACCATTAACAACTAATACCTATTCTGTTTAGTACTTAGGTCTTTTGGTATGATAGTCTTGAATGACTTTCTAGTCAGATCGTTCTGCGTTTCGGATATGAAGTCTCATTGCAAGCTTTAGACAAAGGTGCT  
CTTCAAACCTAGTACTTTTTGTAATCGACTCTATAGCTTCTCAATAAACGCTGGTTCTTCGATCAAGTTTGAATGACTTTCTAGTCAGATCGTTCTGCGTTTCGGATATGAAGTCTCATTGCAAGCTTTAGACAAAGGTGCT  
ATTGAGATATTGGGCCCTTATGGTATCTCGTACACATTCCGACGATTGGCCGAGCGAATAAGTCAACTTCAAAGTGGATTGTTgtgcaagagtgctgtatgaccggtggccgctgcctgggtggggggccctcctcgttgtg  
ggtaaacggggaacccgactctcgaacccgaggaaggctgcacagcagtagtaaggcggttaagacgcagctttttgtagtgtgacaggaatgcaagtgaaatcccatcccttagcgagtgaaagtgcttacgctccggg  
ggcagaacaagagtcggttctcaatttggagatctttagatctgaagatcgtgatagcttcccttactaatataatgaaggggctgaaagcaggttgcgttgctgtcacttcgctgcagcagcttgcgttcgcttgcagcgt  
ctgtaacttgcttcttctcgtccgtccacgaggtgttaaaagagagatagggggcggtatctagcgggagtcgtttcgggtgtatgccaaggggtccctatggacaaggggacaagtgaaatcatcgcttttgggcgctggc  
cctctaccatccatccatagcatccatcgtctcgtattgtactgtacggtatccagacagatagatctattaggtgagagaaaggttagtgtaactaatagatattcttcaatattctattgtatagggatccccattcat  
ctagattcccgctcattacggaatgcctacctaactacatggttagtggtctagggagcgcaattgctagagcagggagaaatgaagagtaatgtatttcagcaagagcagccggacggactattctagttagtctatgactacta

gagtagagttgagtc aaaggtatggtatagcagcctttccgtgctgcctctgggatctcctgtaaacccccatgatgtggtaaaggaggatattaggggaaagcagtgagtgaggattccccctgcggagagccggatgaggggag  
accttcacgtccgggttcggagggcggggataccccaccctacTATCATATTATGCCTTTGCAATGTTACTTGGTTtAACTCTATTTGTGACCTTTTtTtGTATGTGGGAtTCTCTATCTTCTGGGTAGATAATCGATtGTCTTTC  
ATTTTGATAGTGAGTAGTTTTTATACAAAGTCAAGTCAAGAATAA

**nad7**

ATGACGACTAGGAAAAGGCAAAATtAAAAATTTTACTTtGAATTTTGACCTCAACATCCTGCTGCTCATGGTGTTtCACGATTAGTATTGGAAATGAACGGAGAAGTGGTGGAACTGCGGAACCAtATATTGGATCACTCCAgt  
gcggcacaagccgctgacgcgcagtcggctcctatgcccgtagctatgcccgtcttgggtcccccgcacggtggaaggttccgtacaggggtcattgagcacccgggttaagggcggaagtcactcgaactgaaaagagagggcggtt  
gagcaactcaagcgaaacccgcttaccttactacaacatagggacagaggggagaaaggttgtgaaagtgccctcgttatccacacctccggtcggatgaaatggagagcccccacccgggtttcatgagcgtttggcggtctctg  
gaagtcctgtcaagggcgctagcgcatccccggggtgcatcatcaacctgcacctcacatctcgccgtagtggaaagctgtaacccgctcgtgtctcattcaactacatttgttactgtaatctatagcctaacagaagggcag  
cgtcgagggcgttttaggaactcgaactgaaagagagagagataaattcccatacagccacgcccggagagatggcactacagggcaaaagaccgtctggcgaaaacgcccgaagcgtaggcctgcgccgggtgagcagatag  
gggggaaaagggatcccggaacggtgtaagagccagggagggcggttcatttgacggaaatggaaggtctttccctcttataagaaagccctatgaagtttaagggagtgaaatccttggaaaaagaggagcgagcctata  
tataaaatgtaagaaagtcatttattcaatgaatagatgataaaagtcacacgtacgacagacgctgcctacacgcgaattagcttccaaggtcgagcagctctcaatttcactacaggatttgcgaatgaatgctgtggctggg  
ccacctgaaatggcggtgagcgcatgccccggagaccgcacgtacggttttttagggggtatctggcgaaaagaccggcgccgcccacccgcacTAGAGGGACTGAGAAATTAATAGAGTACAAAACCTATCTTCAAGCTTTACCTTA  
TTCTGATCGTTTCAGAagggcgtacggaggtcactgaaatgaaagtcctccgtttcttccggaggtgctgacccgcacgagggcagagatgactaaatgacatatgaaatatgacgacacaaacagcatgtctgtagaagagagaaaca  
ggtggagctaaacgaccacgttgactaacgtatctacaactacatccccgagcggaagtcaaaacggaggggtgaaatgcaagatgccaagcggaatgcatcgccgggacagaggttagggtcgtctccttcccaaccggtccttccct  
gtgtatcggagatataaaagcaggtgcacccgaaaagaacgggaactgggtcgatctatttgcgaagcatccgaagcataactgcacactcacagcatcttcccgagagataggaacattcggtggaacgggtgaaactacacttgc  
tctggatagatgtgtgggacagagggctcgtggtaccttctgccacaccttccctcctcgtcttggaaactgtgtgaacggagagtgggcgaaaagggaggtcctcatcacagaaaaatcatgaaatgggtcgagatgaaat  
gacagcgcccttttctctcttcccttgcgggaggggaactcttctcttattggtcttcaacctcccgcccgccgtggaattgaaatccagccccccttcttctgactcattcatttctgcaagcccagagcgttgctcctctctat  
tgcataacctaaaaagctataagcaagtaacaaaagcgcgctccgcccgtgactaagaaagaggttttgcgcaacaattaaagtgataaggtcgagggaaagtaggggtcctattgaaaggttccctccctcaaaagagact  
agctttcaatactagtcttctacgttacgctgccatttttccaatatattatgaatagcatggcctggggctaaagtaactcaagtgaggagcgctgttattgggtgaccttatttgcacgggttcagagagcacttgtgtatgtgatg  
caagtgaacgtgtcgaaaaagctgtcgtaagtttctgttccgttcttgcacctatTATAGTTTTCTATGATGCCCAAGCAACAGCTtATTCCTTtAGCTGTAGAGAAACTTTTGAATTCGAGGTACCATTAGCAGCT  
CAATATATACGAGTGTATTtCCGTGAAATAACTCGAATTTtAAATCATTtACTTGCTTTAACTACTCATGTATGGATGTGGGAGCATTAACTCCGTTCTCTGTGGGCTTTTGGAGAGCGGGAGAAATTGTTGGAATTCATGAAA  
GAGTCTCGGGAGCCAGGATGCATGCCAGTTTCATACGACCAGGTGGAGTGGCACAAGATCTGCCTCTTGGCTTATGTCGAGATATTGATTCTTCACACAACAAATTGCTTCTCGTATCGATGAATTAGAGAGATGTtAACC GG  
CAACCGTATCTGGAACAACGATTAGTGGATATTGTTACTGTCACTGCACAGCAAGCAAGGATTGGGGATTTCAGTGGTGTAAATGTTAAGAGGTcatgcagacatgaagacattgataagcaatataggggaaagttcccatcagggca  
acaatggttccgctgactctactttaagcatgcataattatgtaagtgaagacttgggtgtgaagccttggagcttgcgttagaagagacaaaagcccggaagctagggtagactgagggaggaacagcgtaaatgagcgaatatgtgt  
aagcccagtcaaaagatgactgttctaaagcggggggagccaccccacotttgaatgggtgttggctctacggacccgtgaacggatttgcctctgqccctctgggcaagtcggaacccggtgagttcacccgggtggaagcaggtccgc  
caaaacccggcatagattaggtgctattgatggaacatggtaagcctatcttctccatatggaagtgctgcgagcacttagagatgcgggttagaggaagcctcaaaaagcgaagccgagctgtaggtcacgtgacctgcaccga  
gttgggtggctgactgggtcttttcccttgatcaaaagcagatcaactgcctctcttctgtttacccaaaactaaagttgggtcgaaatggttttttctgcgccggaaacgtcgaaatgaaatagggggcgccgggttctctttctacaac  
ccttttgatatgatagggcctggctaccttttccctatcctcttatgattaggggctgttaagcccaagaacaaccagtcctgtgtgtggtacggaaggaacgactccgcgaacgtcccgcgcccggaaaagaaagttctcaaccag  
aaccacattccttttgcgtgcggatgtagctaaagtgtctgactctatttggctcatagtttctctgtgttgcggctgtgtctgttgcgcgcgctgaaccaactcaacaaagaaggaaagtagccgggggaggcatctgagaa  
gattcgagcgtatgaagggaaactctcagctacagtttgttttttttggggggggcaggagcccgcacaggttccccactgacttggcccgggcctaagttaaagtgaagtgggtgggcctacccaacccaaCtAGGGGTATGCT  
GGGATTtGCGAAGAGCAGCACCTTACGATGTTtATGACCAATtGGATtTTGACGTACCAGTAGGTACCAGAGGAGATtGCTATGATCGTTACTGTATtCGTATtGAAGAGATGCGACAAAGTCTTCGGATCATTGTGCAATGTCT  
TAATCAAAATGCCTAGCGCATGATCAAAGCCGATGATCGTAAGCTATGTCTCCATCAGATGTGAATGAAACTATCCATGGAATCgtgcgtcgtgtgaacgtacgtcgcgtctcttaacccagactcaggttaccgtcc  
gtctcggaacctttgtggttaggaagttaaagcatccccgggttggcgcatctcatttggcgctagagacatttgggaacatttatttcttcggagcgttttctttccgctcccccccacccgggcatagcgcttcgcttcc  
ggttcttcggaaagaatcaacttacttctaccttcttctcattgactctgggggaaaaggaacccgtctaccagtttgggaagctagacatcaagtaagtgggtgtagagataaactaaagctgacacgcccggagttggctgctggcaca  
caggttggtgcttaccgcacccgagggcaacgcgcggttagcgttctgtgtggttgcaggttccaatgtaactgcgtccaagatcagaacgagcttgcgcgagaccactgccttccattcttgaatgagctgagagcgagc  
catcttaccactgaaactgataagcatctcgttccgggtcgaaagcactaaaagaaaagcaccgggaaacgcgcgcgcataggaaccacgggtaactagtaaagggaaaacggaagtcgctcctgcgcaccagc  
tgaaaaaagccctttcccttctctgtataataaggaagctctcttagctcaaacctatacaaggggtttttatgtctcttctttagtgggttgggttggatggatcctctgtagtaggtcctctgtagtaggtacacacagcagaga  
gggcagcctctagaagcaacaggttgggaaaccaagagaacgcttgccttttcttattcttcttctgccttaggagtagaagtagcacaaaaagagggttgcattattgacccaatgataaaaccactaacaccttctctgtt  
ggggctccgcgcaactgggaaaacgcttgacgcgattgggaaacgggcccactagttacaaagctccaaataggtatcgagaggggtatcacagtcaggttgcgaagaattacccctatttggaaagtacccttcttctctatttaggg  
ggttaagggcgaaaatggcttgatgaatcgttccgttcgccatgcacccggccccacttcaacttgcattatctgtagaggtgtgaagtacacagtgccccacaactatcaatagtagtaggggttgaagacgcagagtgccccccctt  
tcttttctcaagtggccactttttcccgaaacgagtcgggatacccggtgacgtgatatatatatatatacttctttagtgggttgcgttgcgttcaatcgcttcttcaactcccccaaaaaagcaagtaagt  
tggtctaacgagcgcagatgtgaggaagcgggagcaataaaacaaaaaaaatatcttcttctgtccttctacttaaggggcaagagagaagcgttttgcctactgagaaagcgaaacggttcagcgcggaaggttcaagacttttctgagc  
gttagcggaagctagattctcctagcgaggcgcttcgagttagcggaagcctgttagtagcgcggaagccctatgtgtctataatgtctgagccaaaggacactccgccttattcttataaagagcagtcactgagttctgaaacgaatta  
gatccttggtaaatggtcctcaatctatagatagaagcccttatgatgggaaactaccacggttaggtttggagagagatgggacgggttataataatagagggagcagatgcaagcttttttcttctcaatagccggccaaatgactac  
aggtagactcgttctactctacCTCAATTACCATTTTCGAACCTTTATACAGAAGGTTTTTtCGTACGTTCTTCTTACCTACCCGACTTGAAGCACCTTAAAGGAGAAATTGGTGTCTTCTGGTCAGTAATGAAGCAATCGT  
CCtTACCGTtGTAATAAAGAGCACCCGGCTtTGCCCAATTtACAAGGACTCGATTtTATGTCCAACATCACATGCTtAGCAGATGTGGTtACCATCATAGGTACTCAAGATATTGTGTTTGGAGAGGTGGATAGATAG

**rp12**

*rps3*

7

**Table S2. Identification of nMAT2-associated mitochondrial RNAs by RNA-co-immuno-precipitations / cDNAs sequencing.**

cDNAs corresponding to RNAs that were co-purified with the nMAT2-PMH2 particles were obtained by RT-PCRs with specific oligoes to different intron-containing pre-RNAs in *Arabidopsis* mitochondria (see Table S6). The PCR products were cloned into the pGEM-T vector system II (Promega) and sequenced (The Center for Genomic Technologies at the Hebrew University of Jerusalem). The resulting sequencing data is underlined on the corresponding sequences of the 23 group II introns in *Arabidopsis thaliana* (Col-0) mitochondria (Unseld *et al.* 1997). Red letters indicate to C-to-U RNA editing events.
