# Supplementary material for: Analysis of the Roles of the Arabidopsis nMAT2 and PMH2 Proteins Provided with New Insights into the Regulation of Group II Intron Splicing in Land-Plant Mitochondria
Source: MDPI journal article supplement (doi:10.3390/ijms18112428), 2017-11-17
Supplement: s1 [file s1]

**Table S6. Oligonucleotides used in the sequencing of mtRNAs.**

| gene target           | oligonucleotide sequences (5'-to- 3') |
|-----------------------|---------------------------------------|
| <i>nad1</i> intron 1  | Forward: GCAACGTAGAAAGGGTCCTG         |
|                       | Reverse: CAAGGAGAGGTTACCATGA          |
| <i>nad1</i> intron 2  | Forward: TCGAAATATGCCTTTCTAGGAG       |
|                       | Reverse: AACGGGCGGCATCGTTGTA          |
| <i>nad1</i> intron 3  | Forward: GTCATGGCGCAAAAGCAGATATGG     |
|                       | Reverse: TGGTTCCCAAGGATCCAATAT        |
| <i>nad1</i> intron 4  | Forward: TCTTCAATGGGGTCTGCTCT         |
|                       | Reverse: TCACCTTTCAATGGCTTCCT         |
| <i>nad2</i> intron 1  | Forward: AGCGGTTTTCCCAGAGATC          |
|                       | Reverse: TCCAAGAGGAATTGTGCTATG        |
| <i>nad2</i> intron 2  | Forward: TTGCCAAATCTTTTTATTATTAAG     |
|                       | Reverse: CTGATCCGGTCGAGGTGG           |
| <i>nad2</i> intron 3  | Forward: AAGATTTTGA CTGGATACGAA       |
|                       | Reverse: TTATAAAAAGAGGA ACTCGAGCT     |
| <i>nad2</i> intron 4  | Forward: CACTACTAATTGGTATCTTTAT       |
|                       | Reverse: GACTTCGCCGTTCTTTCCC          |
| <i>nad4</i> intron 1  | Forward: TTATGGGAAAGAGTATATTATAG      |
|                       | Reverse: GACCCTATTCTTGAACCCCTC        |
| <i>nad4</i> intron 2  | Forward: TAAGTGATGTTAGAAAGCCGT        |
|                       | Reverse: GGAAATCAGGTTTAAATTTCCA       |
| <i>nad4</i> intron 3  | Forward: TTTGTGCGCCCTTTACCGT          |
|                       | Reverse: TCAATGAAATTTGCCATGTTGC       |
| <i>nad5</i> intron 1  | Forward: AGGATCAGAAGGAAGCGCTA         |
|                       | Reverse: GTGCTTAGGCCCTTCTTC           |
| <i>nad5</i> intron 2  | Forward: TATTACTTTGCAGGAGCTATG        |
|                       | Reverse: GAGAACGAAAGCTTTAGTTTTG       |
| <i>nad5</i> intron 3  | Forward: GATATGATGATTGGTTTAGGTAC      |
|                       | Reverse: GTTAAGGTTGTTGTACACCTG        |
| <i>nad5</i> intron 4  | Forward: CACATTCCGACGATTGGCC          |
|                       | Reverse: ACCTTCTCTCACTCAATAGAT        |
| <i>nad7</i> intron 1  | Forward: ATTTTGGACCTCAACATCCTG        |
|                       | Reverse: CATAGGGCTTTCTATAAGAGG        |
| <i>nad7</i> intron 2  | Forward: GGGACTGAGAAATTAATAGAGT       |
|                       | Reverse: GGATCAGAAAGAAGGGGGC          |
| <i>nad7</i> intron 3  | Forward: GCAAAGGATTGGGGATTCAG         |
|                       | Reverse: AGACTGGTTGTTCTTGGGCT         |
| <i>nad7</i> intron 4  | Forward: GGATTTTGACGTACCAGTAGG        |
|                       | Reverse: TGCCGCCGCGTTTCCCG            |
| <i>cox2</i> intron 1  | Forward: CAAATCTCTATTTTGGTACAAC       |
|                       | Reverse: CTATTATCTTTGTAGAGGAACAG      |
| <i>ccmFe</i> intron 1 | Forward: GAAGCTCTCGCCTTACCAA          |
|                       | Reverse: TACGGACGTAGATGATATCAT        |
| <i>rpl2</i> intron 1  | Forward: GGTAAGCAGGGCTTTCTTG          |
|                       | Reverse: GGAGCTTCATGGGTGTTGC          |
| <i>rps3</i> intron 1  | Forward: CGGTAAGACTTGGA AAAAATCG      |
|                       | Reverse: TAAGCAGCCACCGACCGTT          |
