# Supplementary material for: Analysis of the Roles of the Arabidopsis nMAT2 and PMH2 Proteins Provided with New Insights into the Regulation of Group II Intron Splicing in Land-Plant Mitochondria
Source: MDPI journal article supplement (doi:10.3390/ijms18112428), 2017-11-17
Supplement: s1 [file s1]

**Table S4. Oligonucleotides used in screening of individual T-DNA insertion lines in Arabidopsis.**

| <b>Gene target</b>      | <b>Gene I.D.</b> | <b>oligo name</b> | <b>Oligonucleotide sequence (5'-to-3')</b> |
|-------------------------|------------------|-------------------|--------------------------------------------|
| nMAT2                   | At5g46920        | GT11F             | CTTGATCATGTTTTGTGTCGC                      |
|                         |                  | GT11R             | TGATGTTGTAAAACTAGAATTGAAAAC                |
| PMH2/AtRH53             | At3g22330        | PMH2FLR5          | GCTTTCTCCTTTTACCTCGAACC                    |
|                         |                  | PMH2-Rev          | GCGGATCCCAAGCCCATCACCACCAAC                |
| actin2/8                | At3g18780        | Act2-F            | TCTTCCGCTCTTTCTTTCCAAG                     |
|                         |                  | Act2-R            | CTGGCGTACAAGGAGAGAAC                       |
| SALK T-DNA right border | pROK2 T-DNA      | RB-10064          | CCAGATCCGGTGCAGATTATTTG                    |
| SALK T-DNA left border  | pROK2 T-DNA      | LB-6443           | CATCGCCCTGATAGACGGTT                       |
| SAIL T-DNA left border  | pDAP101 T-DNA    | SynLB             | TAGCCTTGCTTCCTATTATATCTTCC                 |
| SAIL T-DNA right border | pDAP101 T-DNA    | SynRB             | GATCAGATTGTCGTTTCCCGCCTTC                  |
