# Supplementary material for: Analysis of the Roles of the Arabidopsis nMAT2 and PMH2 Proteins Provided with New Insights into the Regulation of Group II Intron Splicing in Land-Plant Mitochondria
Source: MDPI journal article supplement (doi:10.3390/ijms18112428), 2017-11-17
Supplement: s1 [file s1]

**Table S3. List of antibodies used for the analysis of *nmat2* and *pmh2* mutants**

| Antibody     | Protein I.D.                                | origin                      | serum               | dilution | Reference / source                                          |
|--------------|---------------------------------------------|-----------------------------|---------------------|----------|-------------------------------------------------------------|
| 18-kDa       | 18-kDa subunit (NDFSU4) of complex I        | <i>Arabidopsis thaliana</i> | Rabbit (polyclonal) | 1/5,000  | (Meyer <i>et al.</i> 2011, Meyer <i>et al.</i> 2009)        |
| AOX1/2       | Alternative oxidase subunits 1/2            | <i>Sauromatum guttatum</i>  | Mouse (monoclonal)  | 1/500    | (Elthon <i>et al.</i> 1989)                                 |
| AtpA         | Mitochondrial ATP-synthase subunit $\alpha$ | <i>Zea mays</i>             | Mouse (monoclonal)  | 1/5,000  | (Michael <i>et al.</i> 1993)                                |
| AtpB         | Mitochondrial ATP-synthase subunit $\beta$  | <i>Zea mays</i>             | Mouse (monoclonal)  | 1/5,000  | (Michael <i>et al.</i> 1993)                                |
| CA2          | $\gamma$ -carbonic anhydrase-like subunit 2 | <i>Arabidopsis thaliana</i> | Rabbit (polyclonal) | 1/1,000  | (Perales <i>et al.</i> 2005, Sunderhaus <i>et al.</i> 2006) |
| Cox2         | Cytochrome oxidase subunit-2                | <i>Arabidopsis thaliana</i> | Rabbit (polyclonal) | 1/5,000  | Agrisera antibodies, AS04 053A                              |
| HA           | Hemagglutinin protein                       | synthetic peptide           | Rabbit (polyclonal) | 1/500    | Sigma (H6908)                                               |
| Nad9         | NADH-dehydrogenase complex subunit-9        | <i>Triticum spp.</i>        | Rabbit (polyclonal) | 1/50,000 | (Lamattina <i>et al.</i> 1993)                              |
| nMAT2        | Nuclear-encoded Maturase 2                  | <i>Arabidopsis thaliana</i> | Rabbit (polyclonal) | 1/200    | (Keren <i>et al.</i> 2009)                                  |
| PMH2         | Putative mitochondrial RNA helicase 2       | <i>Arabidopsis thaliana</i> | Rabbit (polyclonal) | 1/1,000  | (Matthes <i>et al.</i> 2007)                                |
| RbcL         | Large subunit of chloroplast Rubisco enzyme | <i>Pisum sativum</i>        | Rabbit (polyclonal) | 1/1,000  | Gift of Prof. Michal Shapira, BGU                           |
| RISP         | Rieske iron-sulfur protein                  | <i>Arabidopsis thaliana</i> | Rabbit (polyclonal) | 1/5,000  | Gift of Prof. Ian Small, UWA                                |
| SHMT1        | Serine hydroxymethyltransferase 1           | <i>Spinacia oleracea</i>    | Rabbit (polyclonal) | 1/1,000  | Agrisera antibodies, AS05 075                               |
| VDAC (Porin) | Voltage-dependent anion channel             | <i>Zea mays</i>             | Mouse (monoclonal)  | 1/5,000  | Thomas Elthon collection, PM035                             |

**References**

- Elthon, T.E., Nickels, R.L. and McIntosh, L.** (1989) Monoclonal antibodies to the alternative oxidase of higher plant mitochondria. *Plant Physiol*, **89**, 1311-1317.
- Keren, I., Bezawork-Geleta, A., Kolton, M., Maayan, I., Belausov, E., Levy, M., Mett, A., Gidoni, D., Shaya, F. and Ostersetzer-Biran, O.** (2009) AtnMat2, a nuclear-encoded maturase required for splicing of group-II introns in Arabidopsis mitochondria. *RNA*, **15**, 2299-2311.
- Lamattina, L., Gonzalez, D., Gualberto, J. and Grienemberger, J.-M.** (1993) Higher plant mitochondria encode an homologue of the nuclear-encoded 30-kDa subunit of bovine mitochondrial complex I. *Eur J Biochem*, **217**, 831-838.
- Matthes, A., Schmidt-Gattung, S., Köhler, D., Forner, J., Wildum, S., Raabe, M., Urlaub, H. and Binder, S.** (2007) Two DEAD-Box Proteins May Be Part of RNA-Dependent High-Molecular-Mass Protein Complexes in Arabidopsis Mitochondria. *Plant Physiol*, **145**, 1637-1646.
- Meyer, E.H., Solheim, C., Tanz, S.K., Bonnard, G. and Millar, A.H.** (2011) Insights into the composition and assembly of the membrane arm of plant complex I through analysis of subcomplexes in Arabidopsis mutant lines. *J Biol Chem*, **286**, 26081-26092.
- Meyer, E.H., Tomaz, T., Carroll, A.J., Estavillo, G., Delannoy, E., Tanz, S.K., Small, I.D., Pogson, B.J. and Millar, A.H.** (2009) Remodeled respiration in *ndufs4* with low phosphorylation efficiency suppresses Arabidopsis germination and growth and alters control of metabolism at night. *Plant Physiol*, **151**, 603-619.
- Michael, H.L., Arnost, H. and Elthon, T.E.** (1993) Monoclonal Antibodies to the a- and b- Subunits of the Plant Mitochondrial F<sub>1</sub>-ATPase. *Plant Physiology*, **101**, 931-937.

- Perales, M., Eubel, H., Heinemeyer, J., Colaneri, A., Zabaleta, E. and Braun, H.-P.** (2005) Disruption of a nuclear gene encoding a mitochondrial gamma carbonic anhydrase reduces complex I and supercomplex I+III<sub>2</sub> levels and alters mitochondrial physiology in Arabidopsis. *J Mol Biol*, **350**, 263-277.
- Sunderhaus, S., Dudkina, N.V., Jansch, L., Klodmann, J., Heinemeyer, J., Perales, M., Zabaleta, E., Boekema, E.J. and Braun, H.P.** (2006) Carbonic anhydrase subunits form a matrix-exposed domain attached to the membrane arm of mitochondrial complex I in plants. *J Biol Chem*, **281**, 6482-6488.
