# Supplementary material for: Analysis of the Roles of the Arabidopsis nMAT2 and PMH2 Proteins Provided with New Insights into the Regulation of Group II Intron Splicing in Land-Plant Mitochondria
Source: MDPI journal article supplement (doi:10.3390/ijms18112428), 2017-11-17
Supplement: s1 [file s1]

**Table S5. Lists of oligonucleotides used for the analysis of the splicing profiles of wild-type and mutant plants by RT-qPCR experiments.**

| Gene                       | Forward primer              | genome position | Reverse primer                  | genome position            |
|----------------------------|-----------------------------|-----------------|---------------------------------|----------------------------|
| <i>rpl2</i>                | CCGAAGACGGATCAAGGTAA        | 155542..155561  | CGCAATTCATCACCATTTTG            | (157249..157268)           |
| <i>rpl2</i> intron exon2   | TTAGGAAGAGCCGTACGAGG        | 157142..157161  | CGCAATTCATCACCATTTTG            | (157249..157268)           |
| <i>rps3</i>                | AGCCGAAGGTGAGTCTCGTA        | 26990..27009    | CCGATTTCCGTAAGACTTGG            | (28696..28715)             |
| <i>rps3</i> intron1 exon2  | AGCCGAAGGTGAGTCTCGTA        | 26990..27009    | TCTACGGCGGGGTCACTAT             | (27088..27106)             |
| <i>cox2</i>                | TGGGGGATTAATTGATTGGA        | 40518..40537    | TGATGCTGTACCTGGTCGTT            | (42016..42035)             |
| <i>cox2</i> intron1 exon2  | TGGGGGATTAATTGATTGGA        | 40518..40537    | AGCAGTACGAGCTGAAAGGC            | (40640..40659)             |
| <i>ccmFc</i>               | GTGGGTCCATGTAAATGATCG       | 51765..51785    | CACATGGAGGAGTGTGCATC            | (52856..52875)             |
| <i>ccmFc</i> intron1 exon1 | CCCGGATCGAATCAGAGTT         | 52747..52765    | CACATGGAGGAGTGTGCATC            | (52856..52875)             |
| <i>nad1</i> exon1-2        | GACCAATAGATACTTCATAAGAGACCA | 289014..289040  | TTGCCATATCTTCGCTAGGTG           | (318039..318059)           |
| <i>nad1</i> intron1 exon2  | GACCAATAGATACTTCATAAGAGACCA | 289014..289040  | CGTGCTCGTACGGTTCATAG            | (289133..289152)           |
| <i>nad1</i> exon2-3        | ATTCAGCTTCCGCTTCTGG         | 287943..287961  | TCTGCAGCTCAAATGGTCTC            | (289034..289053)           |
| <i>nad1</i> intron2 exon2  | GGTTGGGTTAGGGGAACATC        | 288936..288955  | TCTGCAGCTCAAATGGTCTC            | (289034..289053)           |
| <i>nad1</i> exon3-4        | AAAAGAGCAGACCCCATTTGA       | 147026..147045  | TCCGTTTGATCTCCCAGAAG            | (287955..287974)           |
| <i>nad1</i> intron3 exon4  | AAAAGAGCAGACCCCATTTGA       | 147026..147045  | GGGAGCTGTATGAGCGGTAA            | (147113..147132)           |
| <i>nad1</i> exon4-5        | AGCCCGGGATCTTCTTGA          | 143401..143418  | TCTTCAATGGGGTCTGCTC             | (147030..147048)           |
| <i>nad1</i> intron4 exon5  | AGCCCGGGATCTTCTTGA          | 143401..143418  | ACGGAGCTGCATCCCTACT             | (143482..143500)           |
| <i>nad2</i> exon1-2        | GCGAGCAGAAGCAAGGTTAT        | 80109..80128    | GGATCCTCCCACACATGTTT            | (81259..81278)             |
| <i>nad2</i> intron1 exon2  | GCGAGCAGAAGCAAGGTTAT        | 80109..80128    | CCCATTCTAACCAGTGGAG             | (80272..80291)             |
| <i>nad2</i> exon2-3        | AAAGGAACTGCAGTGATCTTGA      | 332947..332968  | AATATTTGATCTTAGGTGCATT<br>TTC   | (79761..79785)             |
| <i>nad2</i> intron2 exon2  | CCCGATCCGATAGTTTACAA        | 79641..79660    | AATATTTGATCTTAGGTGCATT<br>TTC   | (79761..79785)             |
| <i>nad2</i> exon3-4        | GCGCAATAGAAAAGGAATGCT       | 330240..330259  | CTATGGGTCTACTGGAGCTAC<br>CC     | (333071..333093)           |
| <i>nad2</i> intron3 exon4  | GCGCAATAGAAAAGGAATGCT       | 330240..330259  | GGCGAATTTCAAACCTTGTGG           | (330377..330396)           |
| <i>nad2</i> exon4-5        | CAAAGGAGAGGGGTATAGCAA       | 327932..327952  | TATTTGTTCTTCGCCGCTTT            | (329793..329812)           |
| <i>nad2</i> intron4exon4   | CTTATTCGTGGCAACCTTCC        | 329705..329724  | TATTTGTTCTTCGCCGCTTT            | (329793..329812)           |
| <i>nad4</i> exon1-2        | ATTCTATGTTTTTCCCGAAAGC      | 162115..162136  | GAAAAACTGATATGCTGCCTT<br>G      | (163664..163685)           |
| <i>nad4</i> intron1 exon2  | CCGTATGATGCGGAAGTCTC        | 163512..163531  | GAAAAACTGATATGCTGCCTT<br>G      | (163664..163685)           |
| <i>nad4</i> exon2-3        | AATACCCATGTTTCCCGAAG        | 163967..163986  | TGCTACCTCCAATTCCTGT             | (167228..167247)           |
| <i>nad4</i> intron2 exon3  | GCGGAACGACCAGAAAAATA        | 167110..167129  | TGCTACCTCCAATTCCTGT             | (167228..167247)           |
| <i>nad4</i> exon3-4        | TTCTCCATAAATTCCTCGATT       | 167577..167598  | TGAAATTTGCCATGTTGCAC            | (169651..169670)           |
| <i>nad4</i> intron3 exon4  | TCTAGCTTGGTTCGGAGAGC        | 169498..169517  | TGAAATTTGCCATGTTGCAC            | complement(169651..169670) |
| <i>nad5</i> exon1-2        | TGGACCAAGCTACTTATGGATG      | 141880..141901  | CCATGGATCTCATCGGAAAT            | complement(142793..142812) |
| <i>nad5</i> intron1 exon2  | TGGACCAAGCTACTTATGGATG      | 141880..141901  | TTCGCAAATAGGTCCGACT             | (141962..141980)           |
| <i>nad5</i> exon2-3        | TACCTAAACCAATCATCATATC      | 190740..1907610 | CTGGCTCTCGGGAGTCTCTT            | (140743..140762)           |
| <i>nad5</i> intron2-exon2  | GTACGATCGTGTCGGGTGA         | 140656..140674  | CTGGCTCTCGGGAGTCTCTT            | (140743..140762)           |
| <i>nad5</i> exon3-4        | AACTCGGATTCGGCAAGAA         | 22023..22041    | GATATGATGATTGGTTAGGT<br>A       | (190740..1907610)          |
| <i>nad5</i> intron3-exon4  | AACTCGGATTCGGCAAGAA         | 22023..22041    | GCCGTGTAATAGGCGACCA             | (22150..22168)             |
| <i>nad5</i> exon4-5        | AACATTGCAAAGGCATAATGA       | 20695..20715    | GTTCTGCGTTTCGGATATG             | (21808..21827)             |
| <i>nad5</i> intron4 exon5  | AACATTGCAAAGGCATAATGA       | 20695..20715    | CCTGTAAACCCCATGATGT             | (20827..20846)             |
| <i>nad7</i> exon1-2        | ACCTCAACATCCTGCTGCTC        | 132118..132137  | AAGGTAAAGCTTGAAGATAAG<br>TTTTGT | (133203..133229)           |

|                           |                             |                            |                                 |                      |
|---------------------------|-----------------------------|----------------------------|---------------------------------|----------------------|
| <i>nad7</i> intron1 exon2 | ACGGTTTTTAGGGGGATCTG        | 133128..133147             | AAGGTAAAGCTTGAAGATAAG<br>TTTTGT | (133203..133229)     |
| <i>nad7</i> exon2-3       | GAGGGACTGAGAAATTAATAGAGTACA | 133179..133205             | TGGTACCTCGCAATTCAAAA            | (134362..134381)     |
| <i>nad7</i> intron2 exon3 | AGTGGGAGAGCCGTGTTATG        | 134182..134201             | TGGTACCTCGCAATTCAAAA            | (134362..134381)     |
| <i>nad7</i> exon3-4       | ACTGTCACTGCACAGCAAGC        | 134718..134737             | CATTGCACAATGATCCGAAG            | (135963..135982)     |
| <i>nad7</i> intron3 exon4 | TAAAGTGAAGTGGTGGGCCT        | 135797..135816             | CATTGCACAATGATCCGAAG            | (135963..135982)     |
| <i>nad7</i> exon4-5       | GATCAAAGCCGATGATCGTAA       | 136007..136027             | AGGTGCTTCAACTGCGGTAT            | (137951..137970)     |
| <i>nad7</i> intron4 exon5 | CGGCCAAATGACTACAGGAT        | 137856..137875             | AGGTGCTTCAACTGCGGTAT            | (137951..137970)     |
| <i>rpl5B</i>              | CAGAAGACCTTTCCGTGCTC        | chr5<br>15904477..15904496 | CACTGGAACCGTGTGTTTG             | (15904525..15904544) |
| <i>actin2</i>             | GGTAACATTGTGCTCAGTGGTGG     | chr3<br>6476501..6476523   | AACGACCTTAATCTTCATGCTG<br>C     | (6476608..6476586)   |
| <i>matR</i>               | AATTTTTGCGAGAGCTGGAA        | 231141.. 231160            | TTGAACCCCGTCCTGTAGAC            | (231313 .. 231294)   |
| 18S nuclear rRNA          | AAACGGCTACCACATCCAAG        | chr3<br>14198079..14198098 | ACTCGAAAGAGCCCGGTATT            | (14198179..14198160) |
| 26S rRNA                  | GACGAGACTTTCGCCTTTTG        | 38542 ... 38523            | CTTGGAGCGAATTGGATGAT            | (38387... 38406)     |
