# Supplementary material for: Analysis of the Roles of the Arabidopsis nMAT2 and PMH2 Proteins Provided with New Insights into the Regulation of Group II Intron Splicing in Land-Plant Mitochondria
Source: MDPI journal article supplement (doi:10.3390/ijms18112428), 2017-11-17
Supplement: s1 [file s1]

**Table S1. Proteins identified in the co-IP assays by LC/MS-MS analysis**A. Proteins identified by co-IPs with the anti-HA antibodies from *nmat2/nMAT2-HA*

| Peptides                                                                                                                                                                                                                                                                                        | At number | Notes                               |
|-------------------------------------------------------------------------------------------------------------------------------------------------------------------------------------------------------------------------------------------------------------------------------------------------|-----------|-------------------------------------|
| <b>Intron maturase, type II family protein (nMAT2)</b><br>MYPYDVPDYAYPYDVPDYAYPYDVPDYA<br>SDVIWNNPEGEADQGNTSWPEFVPTSGPDK<br>IVQEVLLMILEPIYESR<br>YLSYFAPQQR<br>NSVLDDR<br>TAHTVLR<br>ADAATLR<br>GLVSPQDYTSMLVWNYK<br>EDGVSLCSQMWLENFK<br>FLTITAEWYR<br>VEDGEK                                   | At5g46920 | Maturase related protein / splicing |
| <b>DEAD-box ATP-dependent RNA helicase 53 (PMH2/ARTH53)</b><br>GLDVPNVDLIIHYELPNNTETVHR<br>SGGGYGGSSGGYGGGR<br>GRNPLcLVLAPTR<br>SSFGGFGSNDGKR<br>DADRLSYALAR<br>SGGSFGGGMGR<br>AVLEPAMEGR<br>FTELPsIAVER<br>SSGFGDFGSDR<br>ESAPSLDTicLYGGTPIGQQMR<br>TLAGFR<br>RSSFGGFGSNDGKRS<br>KTLAFGIPIIDKI | At3g22330 | RNA chaperon / splicing             |
| <b>pentatricopeptide repeat-containing protein</b><br>INAYASLGNLQK<br>SALTVVDDMIK<br>VMDTALK<br>MLLLGK                                                                                                                                                                                          | At1g26460 | RNA metabolism?                     |
| <b>pentatricopeptide repeat-containing protein</b><br>HILANAPFAPSSVTYR<br>LPDSTSALVGQR<br>TMAFSSAEEAAAER<br>VVADFGAR                                                                                                                                                                            | At1g10270 | RNA metabolism?                     |
| <b>pentatricopeptide repeat-containing protein</b><br>AGMFENAQK<br>IISLYGK<br>TNDFLK                                                                                                                                                                                                            | At1g55890 | RNA metabolism?                     |
| <b>pentatricopeptide repeat-containing protein (PPR36)</b><br>IAFSAAVENLAEK<br>SEKDPDRILEicR<br>AALSLLK                                                                                                                                                                                         | At1g61870 | Translation or RNA metabolism?      |
| <b>Mitochondrial 28S ribosomal protein S29-like protein</b><br>STHAAVNvvvr<br>DTTLSQLTHK<br>WLAPFMR<br>KSYLALR<br>FDEAALK                                                                                                                                                                       | At1g16870 | Translation                         |
| <b>Probable ribosomal protein S11 (putative mitochondrial protein, SUBA3)</b><br>FREQVPVSGESANNSGLSNTGR<br>MTNYTADATAENIGR<br>ATSGSLPDLK                                                                                                                                                        | At1g31817 | Translation                         |

|                                                                                                                                                                                                                                                             |           |                         |
|-------------------------------------------------------------------------------------------------------------------------------------------------------------------------------------------------------------------------------------------------------------|-----------|-------------------------|
| AIIAFR                                                                                                                                                                                                                                                      |           |                         |
| <b>Prohibitin-1, mitochondrial (PHB1)</b><br>VGIIGGLGLYGATHSLYNVEGGHR<br>SAQLIGQAIANNQAFITLR<br>AVVAQYNASQLITQR<br>DKVYPEGTHLMIPWFERPVIYDVR<br>ARPYLVESTSGSR<br>EIAQTIANANK<br>VYPEGTHLMIPWFERPVIYDVR<br>VLPSIINETLK<br>SLGENYSER<br>EFTAAIEAK<br>QVAAQEAER | At4g28510 | Mitochondria biogenesis |
| <b>Prohibitin-6, mitochondrial (PHB6)</b><br>SAQLIGQAIANNQAFITLR<br>AVVAQYNASQLITQR<br>VLPSIIHETLK<br>QVAAQEAER<br>AKPYLVESTSGSR<br>EIAQTISR<br>VLTRPMADQLPEVYR<br>SLGENYR<br>DKVYPEGTHLMIPWFERPIIYDVR                                                      | At2g20530 | Mitochondria biogenesis |
| <b>Prohibitin-7, mitochondrial (PHB7)</b><br>SAQLIGQAIANNEAFITLR<br>VLPSIINETLK<br>QVAAQEAER<br>VLTRPMGDR                                                                                                                                                   | At5g44140 | Mitochondria biogenesis |

B. Proteins identified by co-IPs with the anti-HA antibodies from *nmat2/empty vector control*

| Peptides                                                                                                                                                                                                                                                                                                                                                                             | At number | Notes                                                                 |
|--------------------------------------------------------------------------------------------------------------------------------------------------------------------------------------------------------------------------------------------------------------------------------------------------------------------------------------------------------------------------------------|-----------|-----------------------------------------------------------------------|
| <b>Chaperonin CPN60</b><br>KANLQDLAALTGGEVITDELGMNLEK<br>KANLQDLAALTGGEVITDELGMNLEK<br>QVANATNDVAGDGTcATVLTR<br>LLEQDNPD LGYDAAKGEYVDMVK<br>TPVYTIASNAGVEGAVIVGK<br>LLEQDNPD LGYDAAKGEYVDmVK<br>AAVEEGILPGGGVALLYAAR<br>SAIELSTSDYDKEK<br>VTVSKDDTVILDGAGDKK<br>TQKcELDDPLILIHEK<br>MISTSEEIAQVGTISANGER<br>IGGASEAEVGEKKDR<br>cELDDPLILIHEK<br>TLFNELEVVEGmKLDK<br>RGISMAVD AVVTNLK | At3g23990 | Molecular chaperon / mitochondrial import and macromolecular assembly |
| <b>Heat shock 70 kDa protein 10 (mtHsc70-2)</b><br>ELLLLDVTPLSLGIETLGGVFTR<br>IELSSTSQTENLPFITADASGAK<br>GVNPDEAVAMGAALQGGILR<br>AKIELSSTSQTENLPFITADASGAK<br>IINEPTAAALSYGMTNK<br>SRFETLVNHLIER<br>SQVFSTAADNQTQVGIR<br>EKIPSEIAKEIEDAVADLR                                                                                                                                         | At3g23990 | Chaperone / protein folding                                           |

|                                                                                                                                                                                                                                                                                                                                                                                                                                                                                              |           |                                                 |
|----------------------------------------------------------------------------------------------------------------------------------------------------------------------------------------------------------------------------------------------------------------------------------------------------------------------------------------------------------------------------------------------------------------------------------------------------------------------------------------------|-----------|-------------------------------------------------|
| EAEHAQKDKER<br>GVNPDEAVAmGAALQGGILR<br>QAVTNPTNTVSGTKR<br>SSGGLSEDDIQK<br>EVDEVLLVGGMTR                                                                                                                                                                                                                                                                                                                                                                                                      |           |                                                 |
| <b>Glycine dehydrogenase (decarboxylating) 2 (GLDP2)</b><br>DKATSNiCTAQALLANMTAMYAVYHGPEGLK<br>VVMATDLLALTMLKPPGEFGADIVVGSQGR<br>VVMATDLLALTmLKPPGEFGADIVVGSQGR<br>RHNSATPDEQAQmANYcGFDNLNTLIDSTVPK<br>VVmATDLLALTmLKPPGEFGADIVVGSQGR<br>ESPYLTHPIFNMYHTEHELLR<br>FSGIFDEGLTESQmIEHMSDLASK<br>NImENPAWYTQYTPYQAEISQGR<br>RLMDYGFHGTMSWPVPGTLMIEPTESK<br>NIMENPAWYTQYTPYQAEISQGR<br>FGVPMGYGGPHAAFLATSQEYKR                                                                                   | At2g26080 | Glycine decarboxylase enzyme                    |
| <b>ATP synthase subunit alpha (AtpA)</b><br>EVAFAQFGSDLDAATQALLNR<br>GmALNLENENVGIVVFGGDTAIKEGDLVKR<br>GMALNLENENVGIVVFGGDTAIKEGDLVKR<br>GMALNLENENVGIVVFGGDTAIKEGDLVK<br>AILNSVKPELLQALK<br>LTEVLKQPQYAPLPIEK<br>VVDAMGVPIDGKGALSDHEQR<br>GMALNLENENVGIVVFGGDTAIK<br>ATSESETMYcVYVAIGQK<br>GmALNLENENVGIVVFGGDTAIK<br>DNGMHALIIYDDLK<br>DNGmHALIIYDDLK<br>IRNFYANFQVDEIGR<br>GIRPAINVGLSVSR<br>KmELDAFLKER<br>KSVHEPMQTGLK<br>KSVHEPmQTGLK<br>KMELDAFLKER<br>EAFPGDVFYLHSR<br>NFYANFQVDEIGR | AtMg01190 | Complex V / membrane ATP synthase subunit alpha |

C. Proteins identified by co-IPs with the anti-SHMT antibodies from *nmat2/nMAT2-HA*

| Peptides                                                                                                                                                                                                                                                                                                                                                                                                                                                                                                                                                                 | At number | Notes                      |
|--------------------------------------------------------------------------------------------------------------------------------------------------------------------------------------------------------------------------------------------------------------------------------------------------------------------------------------------------------------------------------------------------------------------------------------------------------------------------------------------------------------------------------------------------------------------------|-----------|----------------------------|
| <b>Serine hydroxymethyltransferase 1 (SHMT1)</b><br>AVmLADmAHISGLVAANVIPSPFDYADVTTTTHK<br>WGVNVQPLSGSPANFHVYTALLKPHER<br>AVMLADMAHISGLVAANVIPSPFDYADVTTTTHK<br>LDPEKWGVNVQPLSGSPANFHVYTALLKPHER<br>EVLYDFEDKINQAVFPGLQGGPHNHTITGLAVALK<br>ALEAFRLDPEKWGVNVQPLSGSPANFHVYTALLKPHER<br>VLEAVHIASNKNTVPGDVSAMVPGGIR<br>LKDFVSAMESSSTIQSEIAK<br>LKDFVSAmESSSTIQSEIAK<br>QLNAPLEEVDPEIADIIIEHEK<br>ImALDLPHGGHLSHGYQTDTKK<br>KISAVSIFSETMPYRLDESTGYIDYDQMEK<br>GYELVSGGTDNHLVLVNLKPK<br>GLELIPSENFTSVSVMQAVGSVMTNK<br>INQAVFPGLQGGPHNHTITGLAVALK<br>GLELIPSENFTSVSVMQAVGSVmTNK | At4g37930 | L-serine metabolic process |

|                                                                                                                                                                                                                                                                                                                                                                                                                                                                                                                                                                                                                                                                                                                                |           |                            |
|--------------------------------------------------------------------------------------------------------------------------------------------------------------------------------------------------------------------------------------------------------------------------------------------------------------------------------------------------------------------------------------------------------------------------------------------------------------------------------------------------------------------------------------------------------------------------------------------------------------------------------------------------------------------------------------------------------------------------------|-----------|----------------------------|
| IMALDLPHGGHLSHGYQTDTKK<br>DFVSAMESSSTIQSEIAK<br>IMALDLPHGGHLSHGYQTDTK<br>ImALDLPHGGHLSHGYQTDTK<br>GLELIPSENFSTSVSmQAVGSVmTNK<br>YYGGNEYIDMAETLcQKR<br>LDESTGYIDYDQmEK<br>KISAVSIFFETMPYR<br>YYGGNEYIDMAETLcQK<br>QATTSEYKAYQEQLSNSAK<br>YYGGNEYIDmAETLcQK<br>YYGGNEYIDmAETLcQKR<br>NTVPGDVSA MVPGGIR<br>LRHEVEEFAK<br>ISAVSIFFETmPYR<br>NTVPGDVSAmVPGGIR<br>LDESTGYIDYDQMEK<br>VAEYFDKAVTIALK<br>ISAVSIFFETMPYR<br>KISAVSIFFETmPYR<br>ALEAFRLDPEK<br>VLEAVHIASNK<br>ISAVSIFFETMPYRLDESTGYIDYDQmEK<br>LIVAGASAYAR<br>AYQEQLSNSAK<br>HEVEEFAK<br>SATLFRPK<br>GFVEEDFAK<br>mGTPALTSR<br>FAQTLMER<br>YSEGYPGAR<br>MGTPALTSR<br>FAQTLmER<br>QATTSEYK<br>EVLDFEDK<br>QFPTIGFEK<br>VAEYFDK<br>GAMIFFRK<br>AVTIALK<br>LYDYAR<br>ALEAFR |           |                            |
| <b>Serine hydroxymethyltransferase 2 (SHMT2)</b><br>ImALDLPHGGHLSHGYQTDTKK<br>QLNASLDEIDPEVADIIELEK<br>INQAVFPGLQGGPHNHTITGLAVALK<br>IMALDLPHGGHLSHGYQTDTKK<br>IMALDLPHGGHLSHGYQTDTK<br>ImALDLPHGGHLSHGYQTDTK<br>YYGGNEYIDMAETLcQKR<br>KISAVSIFFETMPYR<br>YYGGNEYIDMAETLcQK<br>YYGGNEYIDmAETLcQK<br>YYGGNEYIDmAETLcQKR<br>LDENTGYIDYDQLEK<br>NTVPGDVSA MVPGGIR<br>ISAVSIFFETmPYR<br>NTVPGDVSAmVPGGIR<br>ISAVSIFFETMPYR<br>GYDLVSGGTDNHLVLVNLK<br>KISAVSIFFETmPYR<br>LIVAGASAYAR                                                                                                                                                                                                                                                | At5g26780 | L-serine metabolic process |

|                                                                                                                                                                                                          |  |  |
|----------------------------------------------------------------------------------------------------------------------------------------------------------------------------------------------------------|--|--|
| LREMVEEYAK<br>VLELVHIAANK<br>mGTPALTSR<br>YSEGYPGAR<br>VAEYFDLAVK<br>MGTPALTSR<br>ALEAFQLDPSK<br>GFIEEDFAK<br>EVMYDYEDR<br>QFPTIGFEK<br>GAMIFFRK<br>LQSEMSK<br>AYQDQVLR<br>SAVLFRPK<br>LYDYAR<br>GAmIFFR |  |  |
|----------------------------------------------------------------------------------------------------------------------------------------------------------------------------------------------------------|--|--|
