# Supplementary material for: Analysis of the Roles of the Arabidopsis nMAT2 and PMH2 Proteins Provided with New Insights into the Regulation of Group II Intron Splicing in Land-Plant Mitochondria
Source: Int J Mol Sci. 2017 Nov 17;18(11):2428. doi: 10.3390/ijms18112428 (PMC5713396; doi:10.3390/ijms18112428)
Supplement: Supplementary file 1 [file ijms-18-02428-s001.zip]

Archive with 11 entries (11 files):
- Fig. S1-Gene structure_PCR screen.pdf
- Fig. S2 cDNA sequences.pdf
- Fig. S3-Prot. structures.pdf
- Fig. S4. nmat2-HA comp.pdf
- Fig. S5-docking model.pdf
- Table S1 - MS-MS results.pdf
- Table S2 - co-IPs sequences.pdf
- Table S3 -antibodies.pdf
- Table S4 - T-DNA oligos.pdf
- Table S5 - qPCR primers.pdf
- Table S6 - primers cDNAs.pdf
